# Supplementary figures and images for: Silver mineralization on self-assembled peptide nanofibers for long term antimicrobial effect
Source: Royal Society of Chemistry journal article supplement (doi:10.1039/c1jm14090f), 2011-12-21

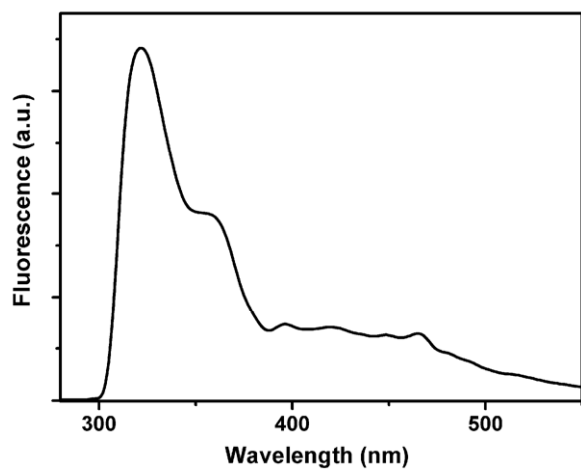

**Fig. S1** Fluorescence emission spectrum of Fmoc-FFECG.

Supplement: c1jm14090f.pdf [file c1jm14090f.pdf]
